# Supplementary material for: Effects of Different Gene Editing Modes of CRISPR/Cas9 on Soybean Fatty Acid Anabolic Metabolism Based on GmFAD2 Family
Source: MDPI journal article supplement (doi:10.3390/ijms24054769), 2023-03-01
Supplement: s1 [file s1]

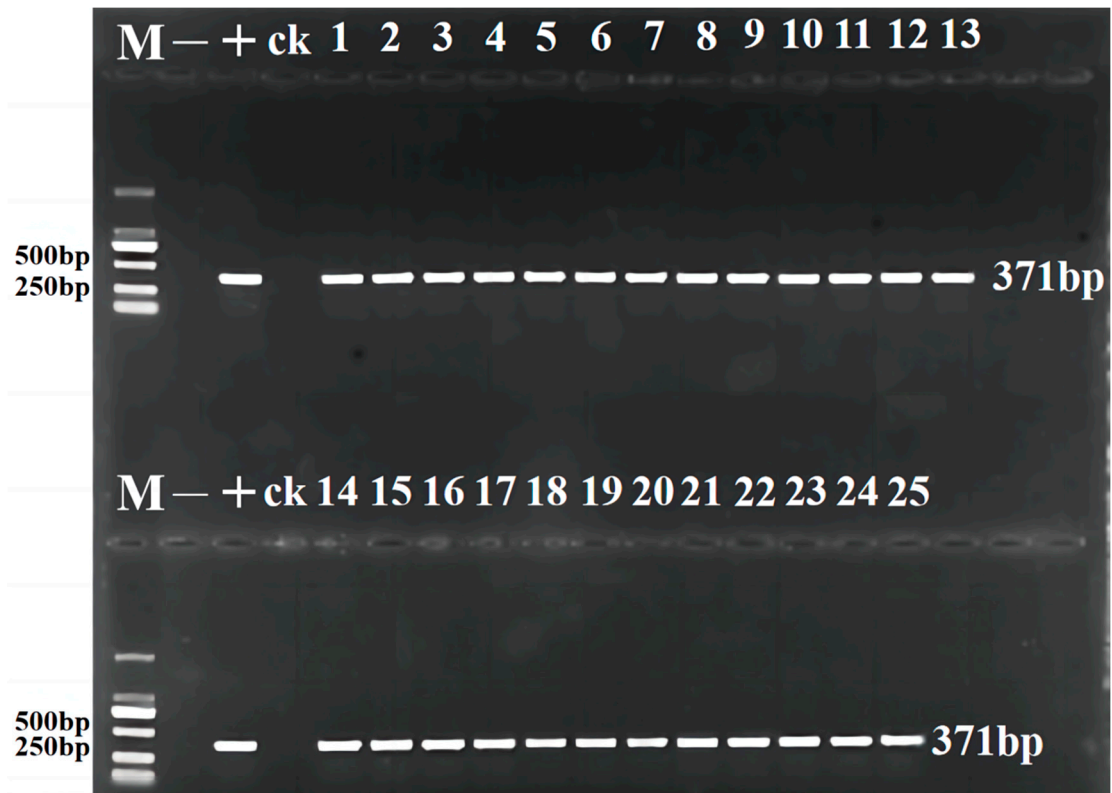

**Figure S3.** PCR detection of Cas9 in some T<sub>1</sub> generation transgenic plants(Original gel image 1-3 corresponds to Fig. A 1-3, 4-6 to Fig. B 1-3, 7-10 to Fig. C 1-4, 11-14 to Fig. E 1-4, 15-18 to Fig. F 1-4, 19-25 to Fig. D 1-7). M: DL2000 DNA marker; -: positive plasmid; -: negative control.

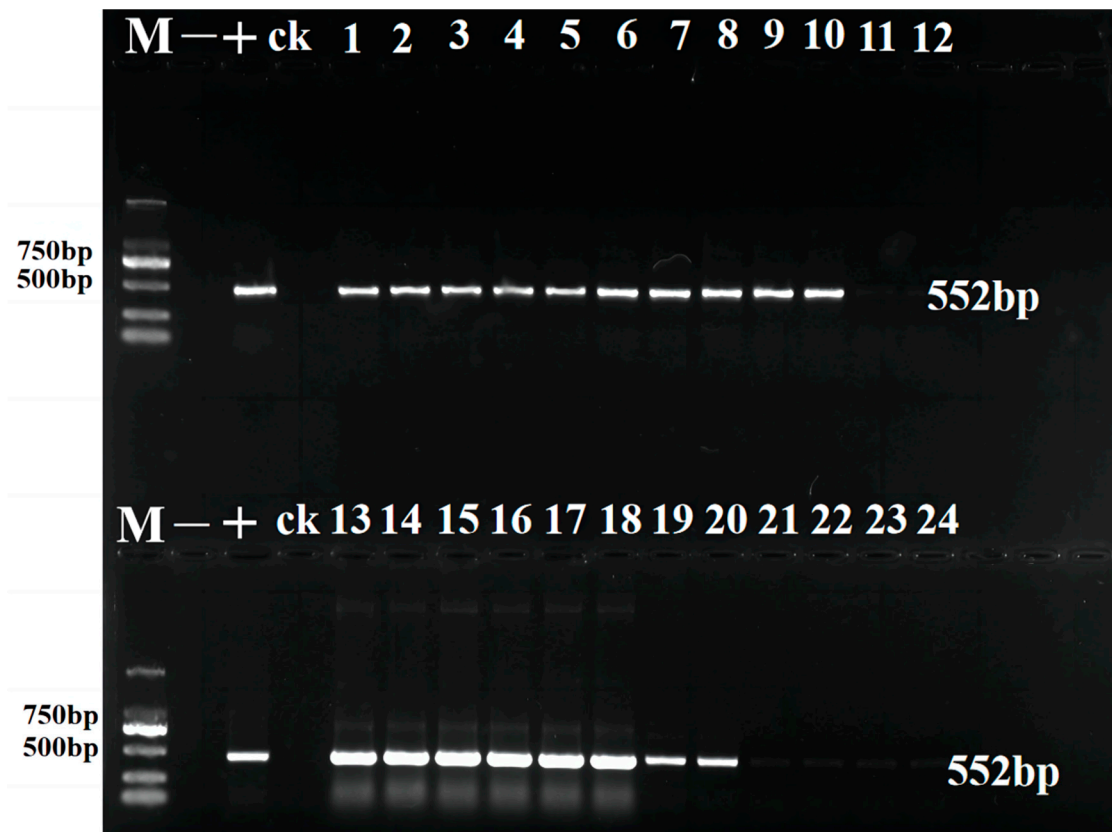

**Figure S4.** PCR detection of *Bar* gene in some T<sub>1</sub> generation transgenic plants(Original gel image1-3 corresponds to Figures A 1-3, 4-6 to Figures B 1-3, 7-9 to Figures F 1-3, 10-13 to Figures C 1-4, 14-17 to Figures E 1-4, 18-24 to Figures D 1-6 ). M: DL2000 DNA marker; -: negative control; +: positive plasmid; -: negative control.

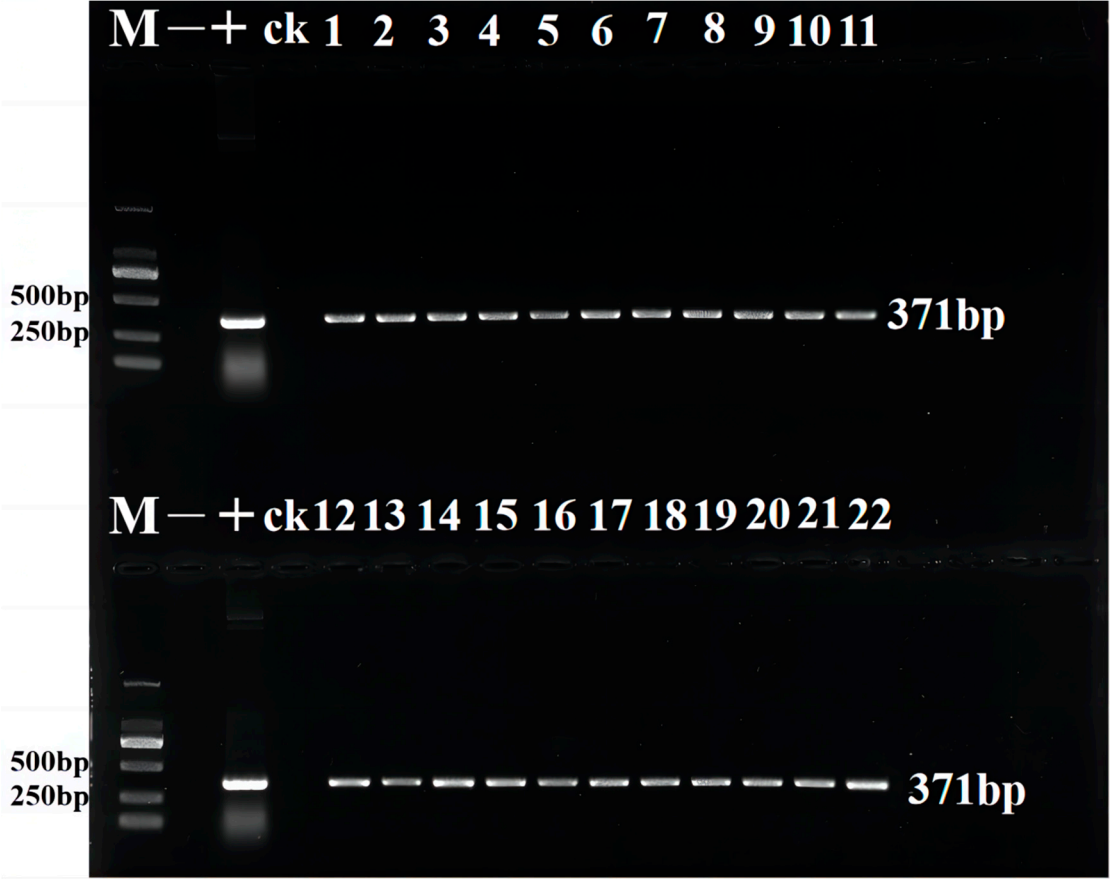

**Figure S5.** PCR detection of Cas9 in some T<sub>2</sub> generation transgenic plants(Original gel image 1-3 corresponds to Fig. A 1-3, 4-6 to Fig. B 1-3, 7-9 to Fig. C 1-3, 10-12 to Fig. E 1-3, 13-16 to Fig. F 1-4, 17-22 to Fig. D 1-6). M: DL2000 DNA marker; +: positive plasmid; -: negative control.

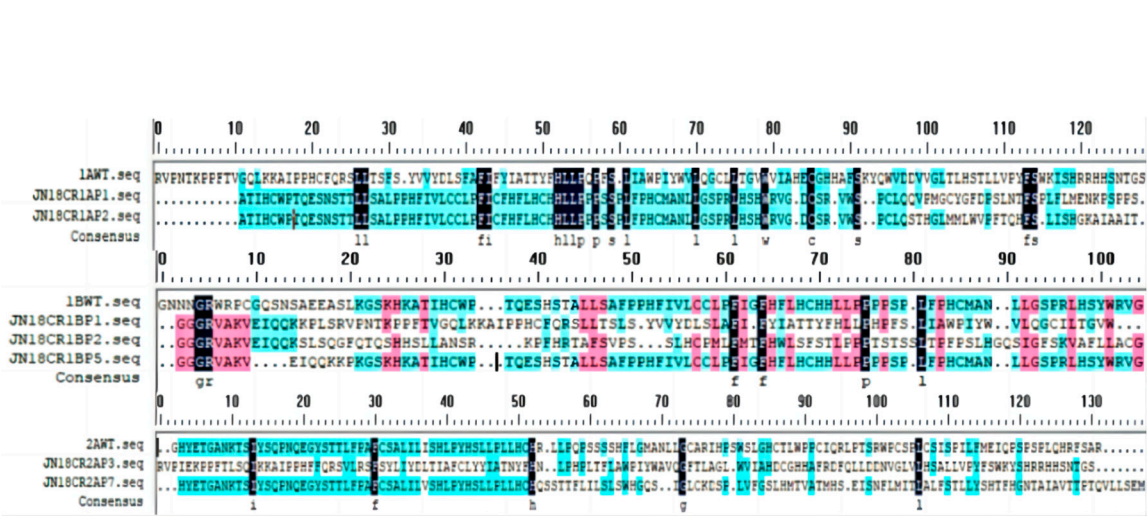

**Figure S6.** Results of partial sequence alignment of mutation sites in transgenic plants (WT: wild type JN18CR: mutant).

**Table S1.** Detection primer sequence.

| Primer           | Sequence           |
|------------------|--------------------|
| CRISPR-FAD2-2As  | AAGTGCGGTGACAAGACA |
| CRISPR-FAD2-2Aas | ACAACCTCAACCCATTCC |
| CRISPR-FAD2-2Bs  | TTTGTTTGCCTCCTGTGA |
| CRISPR-FAD2-2Bas | GTCCAACCCATTCTTCT  |
| CRISPR-FAD2-1As  | TTTGTTTGCCTCCTGTGA |
| CRISPR-FAD2-1Aas | CCAACCCATTCTTCTCC  |
| CRISPR-FAD2-1Bs  | AAGTGCGGTGACAAGACA |
| CRISPR-FAD2-1Bas | TTCTGCAACCCATTCTT  |
| CRISPR-FAD2-2Cs  | GCAAGTGCGGTGACAAGA |
| CRISPR-FAD2-2Cas | AGCCAAACAACCCATTCC |

**Table S2.** Construction of editing vector primer sequence.

| Primer              | Oligo Sequence            |
|---------------------|---------------------------|
| Oligo-FAD2-2A-UP    | GGGTTGAGGTTGTGGAAGTAATCGG |
| Oligo-FAD2-2A-LW    | AAACCCGATTACTTCCACAACCTCA |
| Oligo-FAD2-2B-UP    | GGGTTGGACTAGGAGAGCGGAGTGG |
| Oligo-FAD2-2B-LW    | AAACCCACTCCGCTCTCCTAGTCCA |
| Oligo-FAD2-1A-UP    | GGGTTGGCCTTCAGCAAGTACCAAT |
| Oligo-FAD2-1A-LW    | AAACATTGGTACTTGCTGAAGGCCA |
| Oligo-FAD2-1B-UP    | GGGTTGCAGAAGAAGCCTCTCTCAA |
| Oligo-FAD2-1B-LW    | AAACTTGAGAGAGGCTTCTTCTGCA |
| Oligo-FAD2-2C-UP    | GGGTTGTTTGGCTGAGACTAAATGG |
| Oligo-FAD2-2C-LW    | AAACCCATTTAGTCTCAGCCAAACA |
| Oligo-FAD2-ABC-1-UP | GGGTTGCCTCATCCTCTCACTTTCT |

|                     |                            |
|---------------------|----------------------------|
| Oligo-FAD2-ABC-1-LW | AAACAGAAAGTGAGAGGATGAGGCA  |
| Oligo-FAD2-ABC-2-UP | GGGTTGAACAACATAGGAGAATGAG  |
| Oligo-FAD2-ABC-2-LW | AAACCTCATTCTCCTATGTTGTTCA  |
| Oligo-FAD2-ABC-3-UP | GGGTTGTGTTTGGAAACCCTTGAGAG |
| Oligo-FAD2-ABC-3-LW | AAACCTCTCAAGGGTTCCAAACACA  |

**Table S3.** Specific amplification primer sequence.

| Primer         | Sequence                |
|----------------|-------------------------|
| Cas9-1F        | CACCATCTACCACCTGAGAA    |
| Cas9-1R        | CGAAGTTGCTCTTGAAGTTG    |
| Bar-1F         | CACCATCGTCAACCACTACATCG |
| Bar-1R         | TGAAGTCCAGCTGCCAGAAAC   |
| ACT11s         | CGGTGGTTCTATCTTGGCATC   |
| ACT11as        | GTCTTTCGCTTCAATAACCCTA  |
| 2A-Target-s    | GGGTGACACTATGAAACGGGT   |
| 2A-Target-as   | CTTCATCTCGCTCAAGAGAACC  |
| 2B-Target-s    | CATCCTTACTGGTGTTTGGGTC  |
| 2B-Target-as   | GATACTGGACTTCTGCTTTGGC  |
| 1A-Target-s    | AGGGTTCCAAACACAAAGCC    |
| 1A-Target-as   | GGGAACCTGTGTTGGAGTGAT   |
| 1B-Target-s    | GGAAACAATAATGGGAGGTGG   |
| 1B-Target-as   | CACCCACACGCCAGTAAGAA    |
| 2C-Target-s    | GTGGCCGAAGTATGTTCC      |
| 2C-Target-as   | AACCTTGGACAGCCCAGTAGA   |
| T-2A-Target-s  | GGGTGACACTATGAAACGGGT   |
| T-2A-Target-as | CCTGTGTTGGAGTGGTGACG    |
| T-2B-Target-s  | ACTGCTGTTCTCCTGCCA      |

|                |                          |
|----------------|--------------------------|
| T-2B-Target-as | GATACTGGACTTCTGCTTTGGC   |
| T-1A-Target-s  | AACAACAATGGGAGGTAGAGGT   |
| T-1A-Target-as | CTGTGTTGGAGTGATGGCG      |
| T-1B-Target-s  | CAAAGTTGAAATTCAGCAGAAGAA |
| T-1B-Target-as | CACCCTATTGTGAGTGTGATGAG  |
| T-2C-Target-s  | TTTGAAGCGGGTGCCATT       |
| T-2C-Target-as | TCATCCCGCTCAAGAGAACC     |

**Table S4.** q-RTPCR primer sequence.

| Primer    | Sequence                 |
|-----------|--------------------------|
| FAD2-2A-A | TGGA AAAAGTGTGGTGG AATAG |
| FAD2-2A-S | ATGGGTGACACTATGAAACGG    |
| FAD2-2B-A | ACCCTGGACAGCCCAATAG      |
| FAD2-2B-S | CGCTCATTCTCCTATGTTGTTT   |
| FAD2-1A-A | CAACAGTGAATGGTGGCTTTA    |
| FAD2-1A-S | ACAACAATGGGAGGTAGAGGT    |
| FAD2-1B-A | AATCACCCACACGCCAGT       |
| FAD2-1B-S | CTCCTCCCTCACCCCTTTT      |
| FAD2-2C-A | AGAATGAGCGGAAAACAGAAC    |
| FAD2-2C-S | GCCAACAGGAAGTCAGAGGT     |
| ACT11s    | CGGTGGTTCTATCTTGGCATC    |
| ACT11as   | GTCTTTCGCTTCAATAACCCTA   |
